# Supplementary material for: The Mitogenome of Sedum plumbizincicola (Crassulaceae): Insights into RNA Editing, Lateral Gene Transfer, and Phylogenetic Implications
Source: MDPI journal article supplement (doi:10.3390/biology11111661), 2022-11-13
Supplement: s1 [file s1]

|             |                                                                                                                                                   |
|-------------|---------------------------------------------------------------------------------------------------------------------------------------------------|
| atpB        | 10 20 30 40 50 60 70 80 90 100<br>MRISPTTSDPGISAFKKKHLGRIVQIIIGPVLDDVVFSPGNMPPNIYNALVVKGRDITGQQINVTCCEVQQLLGNNRVRAVAMSATDGLMRGMEVVDTGAPLSV        |
| atpB-pseudo | MRISPTTSDPGISAFKKKHLGRIVQIIIGPVLDDVVFSPGNMPPNIYNALVVKGRDITGQQINVTCCEVQQLLGNNRVRAVAMSATDGLMRGMEVVDTGAPLSV                                          |
| atpB        | 110 120 130 140 150 160 170 180 190 200<br>PVGGVTLGRIFNVLGEFVDNLGVPDGTGTSPIHRSAPAFIQDITKLSIFETGKIVVDLLAPYRRGGKIGLFGGAGVVKTVLIMELINNIKAHGGVSVFG    |
| atpB-pseudo | PVGGVTLGRICNVLGEFVDNLGVPDGTGTSPIHRSAPAFIQDITKLSILKQ*SS--RSFSPLWRKNRT--IRGAGVVKTVLIMELINNIKAHGGVSVFG                                               |
| atpB        | 210 220 230 240 250 260 270 280 290 300<br>GVGERTRREGNDLYEMEKESGVINEKNIAESKVALVYQGMNEPPGARMRVGLTALTMAEYFRDVENQDVLFFDINIFRFVQAGSEVSALLGRMPSAVGYQP  |
| atpB-pseudo | GVGERTRREGNDLYEMEKESGVINEKNIAE*KVALVYQGMNEPPGARMRVGLTALTMAEYFRDVENQDVLFFDINIFRFVQAGSEVSALLGRMPSAVG*KT                                             |
| atpB        | 310 320 330 340 350 360 370 380 390 400<br>TLSTEMGSL-----QERITSTKESGTSISQAVVYP--ADDLTDPAPATTFPAHLDATTVLSRGLAAKGIY-----PAYDPLDSTSTMLQPRIVGEEH      |
| atpB-pseudo | YF*Y*NGFFTRKKNYFYQRRVYNFYSSCLCTCRREFD*PCACNDIC--AFRCYCTIKRISC--RYLSSSGSFREFNVNAPTSDCW*GT---L*NCSKS*GN                                             |
| atpB        | 410 420 430 440 450 460 470 480 490 500<br>YETAQRVKETLQRYKELQDIIAILGLD-ELSEEDRL---TVARARKIEFFSQPFVFA---EVFTGSPGKYVGLVETIRGFKLILSGELDSLPEQAFY      |
| atpB-pseudo | FTTLQRTSRHYS-YPVWVGRIIRRGSGFNSTSNQNETFFLPTLFRSRFSFYRSRKICWFSRNN*RV*INSLG---GII*S-----S*AGF                                                        |
| atpB        | 510 520<br>LVGNIDEATAKAVNLEMESSKSNK*---                                                                                                           |
| atpB-pseudo | LFGR*HRRSYRE-GCELRNGEQIE*MX                                                                                                                       |
| atpE        | 10 20 30 40 50 60 70 80 90 100<br>MTFNLVCLTPNRIIVDSEVKEIILSTNSGGIIGVLPNAPIATAVDIGILIRLNNE-----WLTMALM-----GGFARIGNNTITILVNDAAEK                   |
| atpE-pseudo | MTFNLVCLTILIELFGIPIK*KK-----SSYLLIVDKLAYYQTTLLLLQL*I*GF*EYALTNG*RWL*WAVLLE*VIMRSLF**MMQRRVVTLI-----                                               |
| atpE        | 110 120 130 140 150 160<br>SDIDPQEAQQTLEKAEETNLQKAEGRQTIKANLALRRARTVEAINTIS*                                                                      |
| atpE-pseudo | ---PKKPNKLLK-----KRRKRI-----CRRKRVRDKQLRQI*LSDELGHE*RLSIQFQX                                                                                      |
| ndhC        | 10 20 30 40 50 60 70 80 90 100<br>MFLLYEYDIFWAFLLISSVIPVFLISGVLATISKGPEKLSSYESGGIEPMGDADWLQFRIRYMFALV-FVVDVEYVFLYWPAMSFDDVGVSVFIEALI              |
| ndhC-pseudo | MFLLYEYDIFWAFLLISSVIPVAFRISGVLATISKGLEKLSSYESGGIEPMGDADWLQFRIRYIIICLL*FLLFLMLKLEFFFIQGP*VLM*WVYPYL*KLS                                            |
| ndhC        | 110 120<br>FVLI--LIVGSVYAWRKGALEWS*--                                                                                                             |
| ndhC-pseudo | FSCLS*LLVQFMHGEKE---HWNGLX                                                                                                                        |
| ndhJ        | 10 20 30 40 50 60 70 80 90 100<br>MQGRLSAWLKHLVHRSIGFDYQGIEITLQIKSEDWHSIAVILYVYGNYLRSQCAYDVAPGGMLASVYHLTRIEYGVDPQPEEVCIKVFPKSPRIPSV               |
| ndhJ-pseudo | MQGRLSAWLKHLVHRSIGFDYQGIEITLQIKSEDWHSIAVILYVYGNYLRSQCAYDVAPGGMLASVYHLTRI*YGVDPQPEEVCIKVFPKSPRIPSV                                                 |
| ndhJ        | 110 120 130 140 150<br>FWVWKSSDFQERESYDMLGIYYDNHPRILKRILMPESWIGWPLRKDYIAPNFYEIQDAH*                                                               |
| ndhJ-pseudo | FWVWKSSDFQERESYDMLGIYYDNHPRILKRILMPESWIGWPLRKDYIAPNFYEIQDAH*                                                                                      |
| ndhK        | 10 20 30 40 50 60 70 80 90 100<br>MVLAPFSDNKKNKVKKKLETVMSNIEFPLVNRRTQNS-----VIST-----TS-----NDLSNWSRLSSWPLLYGTSCCF                                |
| ndhK-pseudo | MVLAPFADNKKNKVKKK---A*DSYEFH*VSFS*SNNPKFSYFNYIK*SFQLVKTLQFMATSLRYQLLH*ICFINRLT---IRL*SFWT---GTK---                                                |
| ndhK        | 110 120 130 140 150 160 170 180 190 200<br>IEFASLIGSRFDFFRGLVPRSSPRQADLILTAGTVTKMAPSLVRLYEQMPPEKYVIAMGACTITGGMFSTDSYSTVRGVDKLIPDVVLPGCCPKPEA      |
| ndhK-pseudo | IES*T---SRPNFN-----SGYR-----YDE-----NCSLFS-----E                                                                                                  |
| ndhK        | 210 220 230 240 250 260 270 280 290 300<br>IIDALTKLRKISR---EYDDRISRQ---QGNRCFTTNHK--FEVGRSTHTG---NYDQGLLYQSP-----YTSISISLFTFFKY                   |
| ndhK-pseudo | II*A--NARTKICYCYGGLYNRGNQAQYRFL*HGSGSG*TNSTRGCLLAGLSTETGGHYICFNKTA*ENFSRNL*R*N*VSTGESVFYQSQV*GWTQYSY                                              |
| ndhK        | 310 320 330<br>KSLVS-----SHELLK*---                                                                                                               |
| ndhK-pseudo | WKL*SRITLSIAIYVRDLS*NIFKIQKFSIFTRIAEVX                                                                                                            |
| rbcl        | 10 20 30 40 50 60 70 80 90 100<br>MSPQETKASVGFKAGVKDYKLYTYTPEYETKDTDILAAFRVTPQPGVPEEAGAAVAASSTGTWTTVWTDGLTSLDRYKRCYHIEPVAGEENQYIAY                |
| rbcl-pseudo | MSPQETKASVGFKAGVKDYKLYTYTPEYETKDTDILAAFRVTPQPGVPEEAGAAVAASSTGTWTTVWTDGLTSLDRYKRCYHIEPVAGEENQYIAY                                                  |
| rbcl        | 110 120 130 140 150 160 170 180 190 200<br>VAYPLDLFEEGSVTNMFTSIVGNVFGFKALRALRLLEDLRIPVAYVKTFOGPPHGIQVERDKLNKYGRPLLGCTIKPKLGLSAKNYGRAVYECRLRGGLDFT |
| rbcl-pseudo | VAYPLDLFEEGSVTNMFTSIVGNVFGFKALRALRLLEDLRIPVAYVKTFOGPPHGIQVERDKLNKYGRPLLGCTIKPKLGLSAKNYGRAVYECRLRGGLYFT                                            |
| rbcl        | 210 220 230 240 250 260 270 280 290 300<br>KDDENVNSQPFMRWRDRFLFCAEAIYKQAETGEIKGHYLNATAGTCEEMMKRAVFARELGAPIVMHDYLTGGFTANTSLAHYCRDNGLLHIHRAMHAV     |
| rbcl-pseudo | KDDENVNSQPFMRWGRDRFLFCAEAIYKQAETGEIKGHYLNATAGTCEDMMKRAVFARELGAPIVMHDYLTGGFTANTSLAHYCRDNGLLHIHRAMHAV                                               |
| rbcl        | 310 320 330 340 350 360 370 380 390 400<br>IDRQKNHGIHFVRVLAKALRMSGGDHIHSGTVVGKLEGERDITLGFVDLLRDDFIEKDRSRGIYFTQDQVWSLPGVLPVASGGIHVVHMPALTEIFGDDSVL |
| rbcl-pseudo | IDRQKNHGIHFVRVLAKALRMSGGDHIHSGTVVGKLEGERDITLGFVDLLRDDFIEKDRSRGIYFTQDQVWSLPGVLPVASGGIHVVHMPALTEIFGDDSVL                                            |
| rbcl        | 410 420 430 440 450 460 470 480<br>QFGGGTLGHWPWGNAPGAVANRVALEACVQARNEGRDLAREGNEITREACKWSPELAAACEVWKEIKFEFEAMDTL*                                  |
| rbcl-pseudo | QFGGGTLGHWPWGNAPGAVANRVALEACVQARNEGRDLAREGNEITREACKWSPELAAACEVWKEIQDFD-I*DSHFFRIVLRVTRKR*                                                         |
