# Supplementary material for: The Mitogenome of Sedum plumbizincicola (Crassulaceae): Insights into RNA Editing, Lateral Gene Transfer, and Phylogenetic Implications
Source: MDPI journal article supplement (doi:10.3390/biology11111661), 2022-11-13
Supplement: s1 [file s1]

|                                   |    |                          |    |           |
|-----------------------------------|----|--------------------------|----|-----------|
| <i>H. parviflora rps1</i>         | N- | 167 AA<br>RPS1           | -C | KR559021  |
| <i>S. plumbizincicola Rps1</i>    | N- | 36 AA<br>172 AA<br>RPS1  | -C | OP558021  |
| <i>A. trichopoda rps2</i>         | N- | 221 AA<br>RPS2           | -C | KF754803  |
| <i>S. plumbizincicola Rps2</i>    | N- | 219 AA<br>61 AA<br>RPS2  | -C | OP558022  |
| <i>H. parviflora rps10</i>        | N- | 116 AA<br>RPS10          | -C | KR559021  |
| <i>S. plumbizincicola Rps10</i>   | N- | 20 AA<br>116 AA<br>RPS10 | -C | OP558023  |
| <i>A. trichopoda rps14</i>        | N- | 100 AA<br>RPS14          | -C | KF754803  |
| <i>S. plumbizincicola Rps14-1</i> | N- | 100 AA<br>RPS14          | -C | OP558024  |
| <i>S. plumbizincicola Rps14-2</i> | N- | 100 AA<br>RPS14          | -C | OP558025  |
| <i>H. parviflora rps19</i>        | N- | 94 AA<br>RPS19           | -C | KR559021  |
| <i>S. plumbizincicola Rps19-1</i> | N- | 95 AA<br>80 AA<br>RPS19  | -C | OP558026  |
| <i>S. plumbizincicola Rps19-2</i> | N- | 95 AA<br>68 AA<br>RPS19  | -C | OP558027  |
| <i>V. vinifera rpl2</i>           | N- | 334 AA<br>RPL2           | -C | NC_012119 |
| <i>S. Plumbizincicola Rpl2</i>    | N- | 24 AA<br>196 AA<br>RPL2  | -C | OP558028  |
| <i>H. parviflora sdh3</i>         | N- | 107 AA<br>SDH3           | -C | KR559021  |
| <i>S. plumbizincicola Sdh3</i>    | N- | 41 AA<br>99 AA<br>SDH3   | -C | OP558029  |

 N-terminal region

 Mitochondrial homologous region

 C-terminal region
