# Supplementary material for: The Mitogenome of Sedum plumbizincicola (Crassulaceae): Insights into RNA Editing, Lateral Gene Transfer, and Phylogenetic Implications
Source: MDPI journal article supplement (doi:10.3390/biology11111661), 2022-11-13
Supplement: s1 [file s1]

### Clean Illumina reads

Maximum: 28849×

Minimum: 1031×

Average: 2516.78×

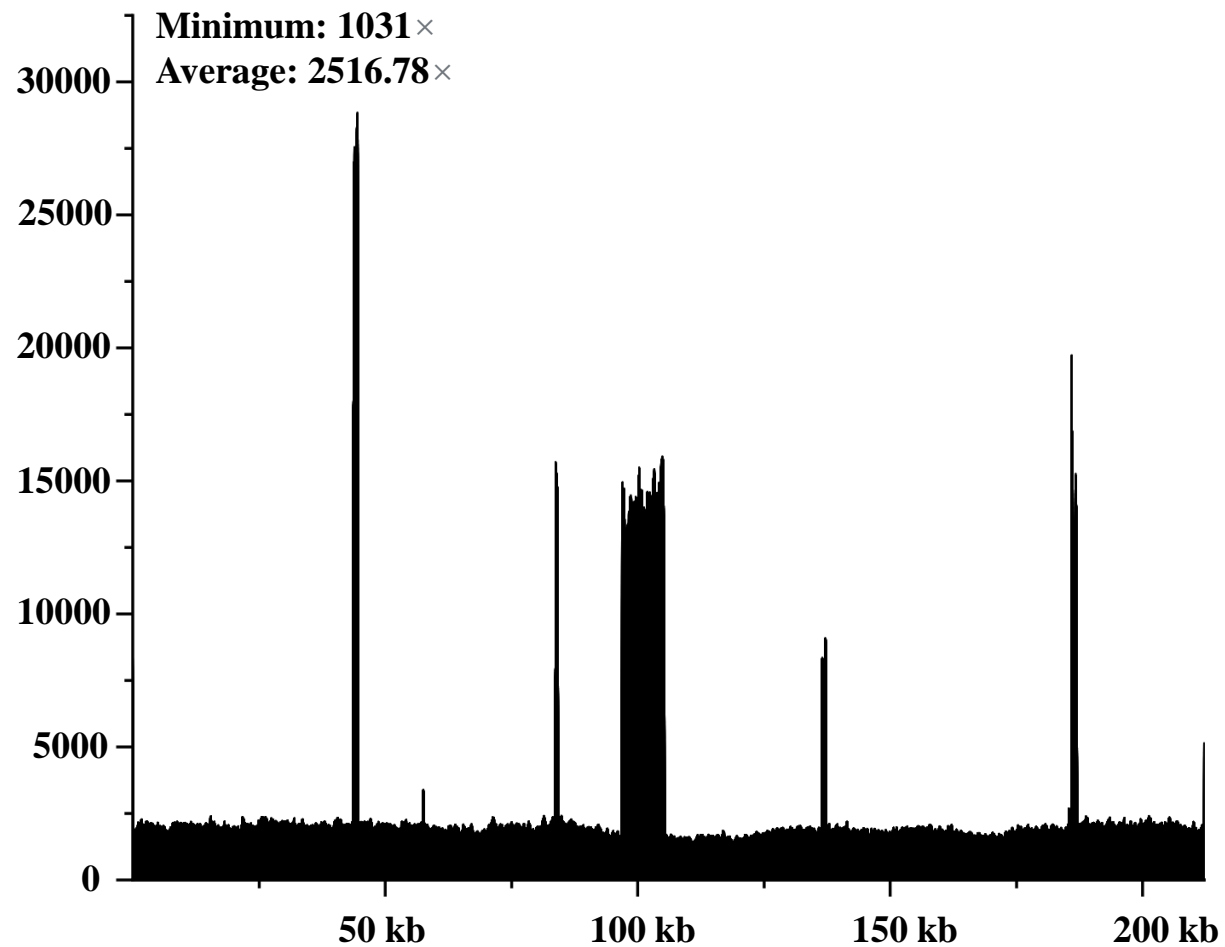

Genome position

### Corrected ONT reads

Maximum: 3562×

Minimum: 61×

Average: 280.53×

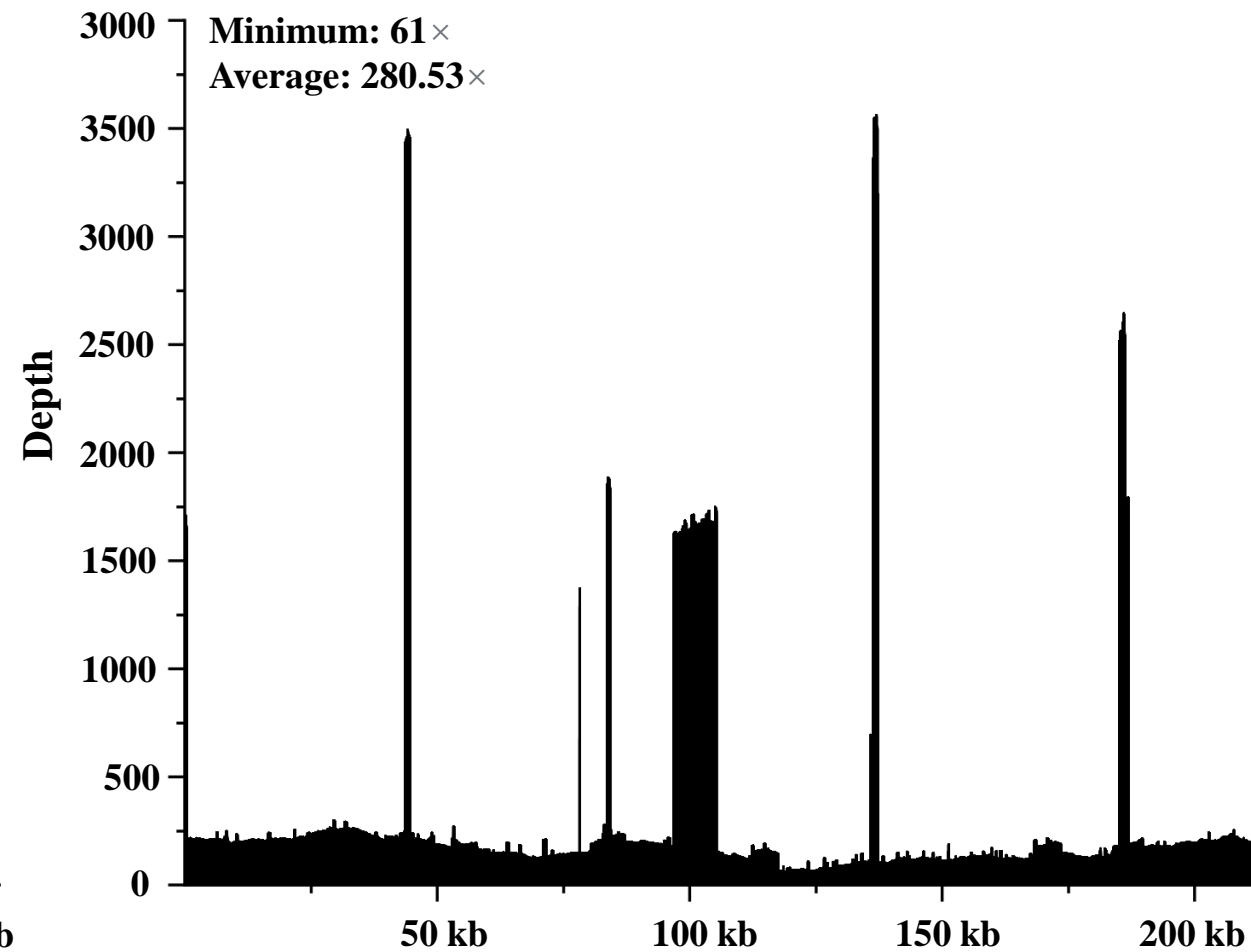

Genome position
