# Supplementary figures and images for: The Mitogenome of Sedum plumbizincicola (Crassulaceae): Insights into RNA Editing, Lateral Gene Transfer, and Phylogenetic Implications
Source: MDPI journal article supplement (doi:10.3390/biology11111661), 2022-11-13

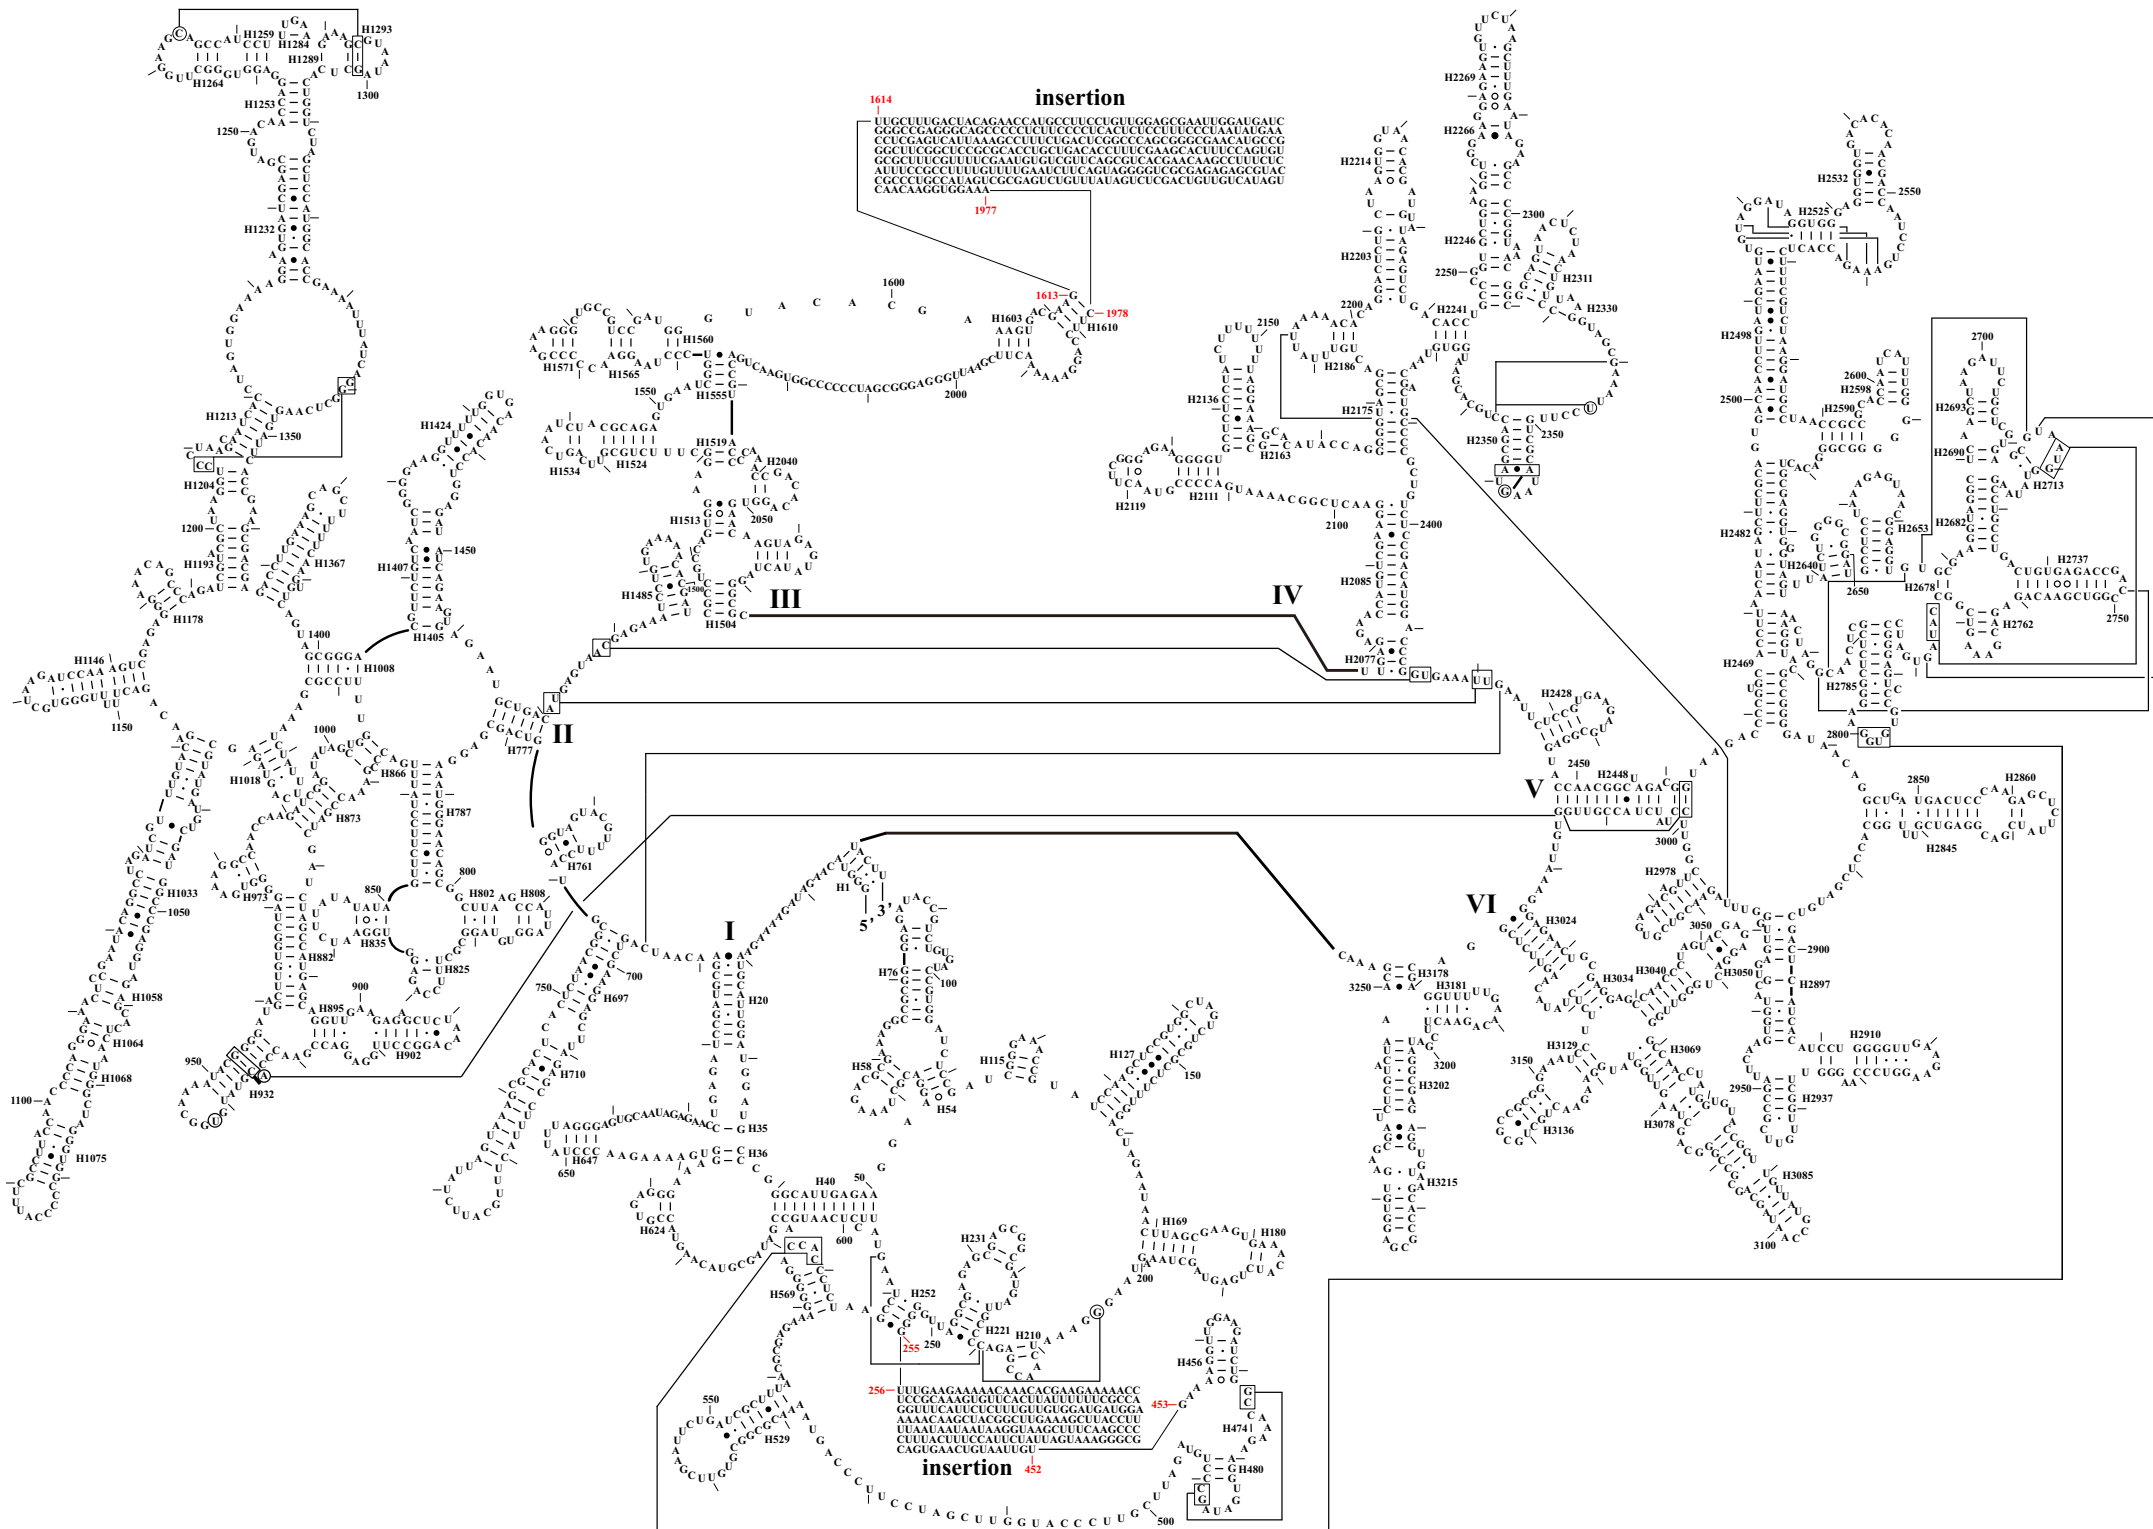

Supplement: s1 [file s1]

Recombination via LDRs

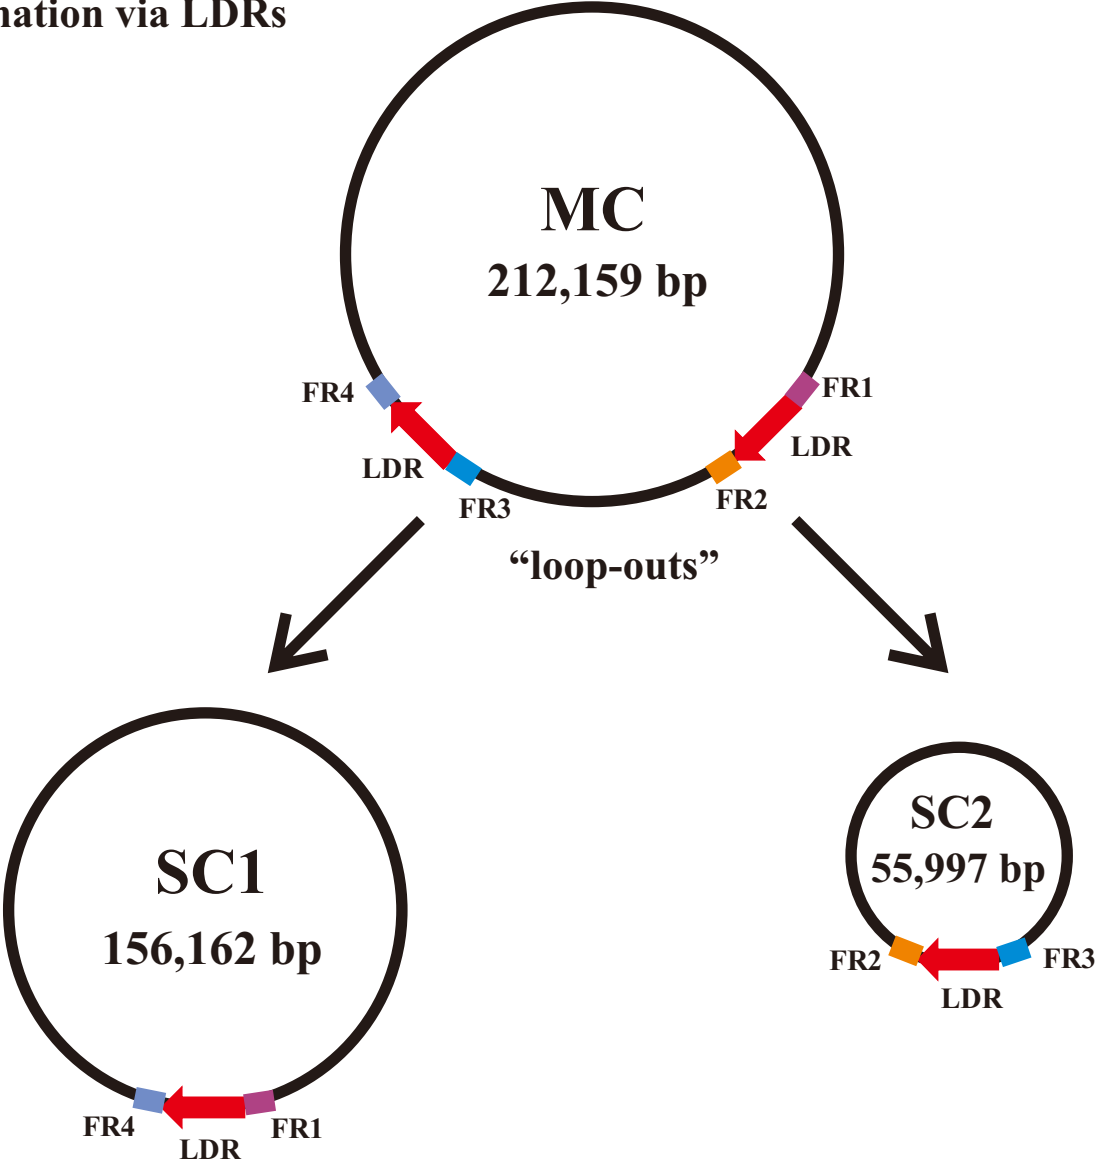

Four types of boundary sequences

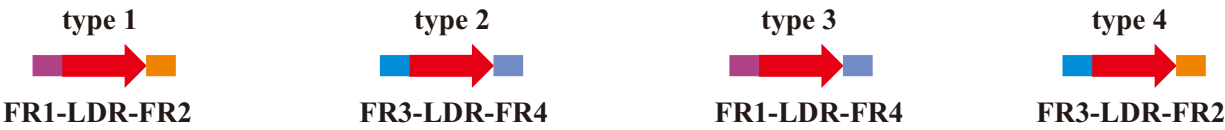

Supplement: s1 [file s1]
